# Supplementary material for: Comparative Evaluation of the Performance of Sterile Filters for Bioburden Protection and Final Fill in Biopharmaceutical Processes
Source: MDPI journal article supplement (doi:10.3390/membranes12050524), 2022-05-16
Supplement: s1 [file s1]

Supplementary Information

# Comparative Evaluation of the Performance of Sterile Filters for Bioburden Protection and Final Fill in Biopharmaceutical Processes

Jimin Na <sup>1</sup>, Dongwoo Suh <sup>2</sup>, Young Hoon Cho <sup>3,4,\*</sup> and Youngbin Baek <sup>1,\*</sup>

<sup>1</sup> Department of Biological Engineering, Inha University, 100 Inha-ro, Michuhol-gu, Incheon 22212, Korea; jmna0227@gmail.com

<sup>2</sup> School of Chemical and Biological Engineering, College of Engineering, Institute of Chemical Process (ICP), Seoul National University (SNU), 1 Gwanak-ro, Gwanak-gu, Seoul 08826, Korea; dwsuh1@snu.ac.kr

<sup>3</sup> Green Carbon Research Center, Korea Research Institute of Chemical Technology (KRICT), 141 Gajeong-ro, Yuseong-gu, Daejeon 34114, Korea

<sup>4</sup> Department of Advanced Materials and Chemical Engineering, University of Science & Technology (UST), Yuseong-gu, Daejeon 34113, Korea

\* Correspondence: yhcho@kRICT.re.kr (Y.H.C.); ybbaek@inha.ac.kr (Y.B.); Tel.: +82-42-860-7684 (Y.H.C.); +82-32-860-7516 (Y.B.)

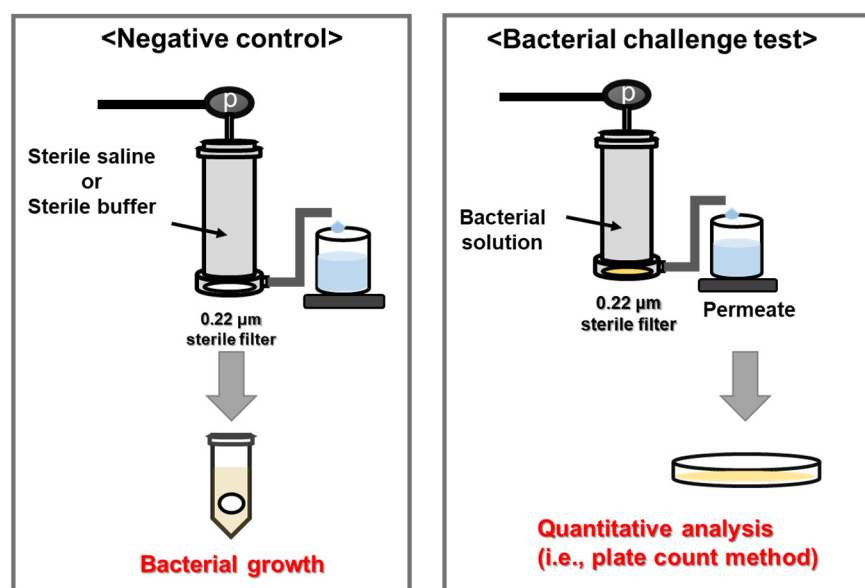

Figure S1. Experimental procedure of bacterial challenge test with negative control.

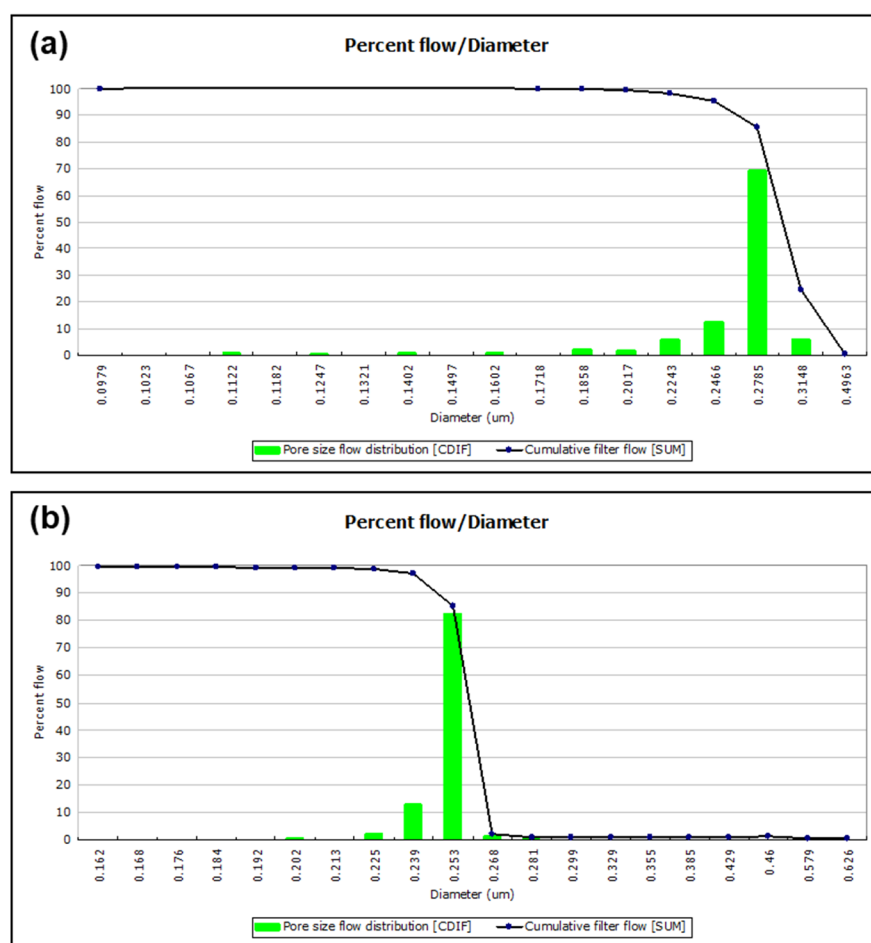

Figure S2. Gas-liquid porometry for (a) filter A and (b) filter B.

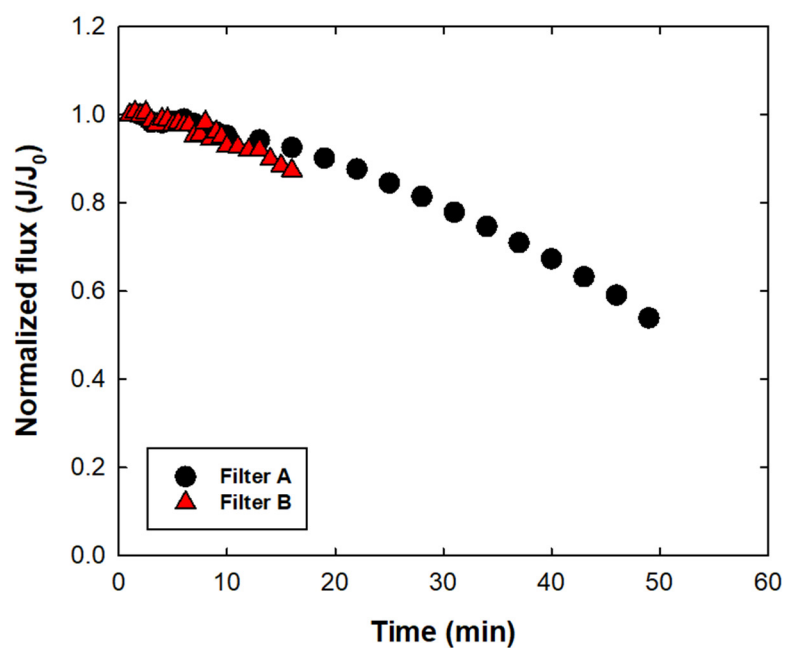

Figure S3. Normalized flux versus time plot for LB broth filtration using filters A and B.

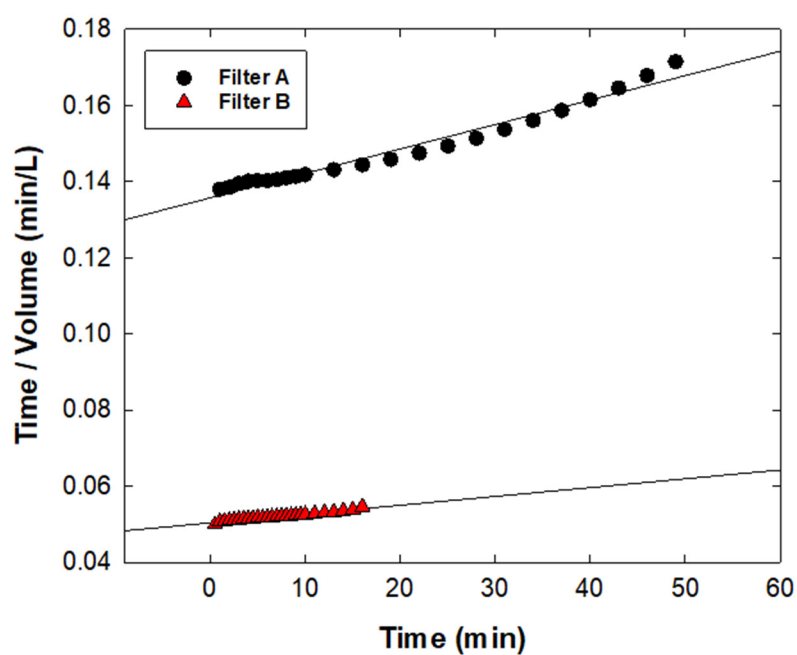

Figure S4. Time versus time/volume plot for calculating maximum permeate volume ( $V_{max}$ ) of filters A and B.

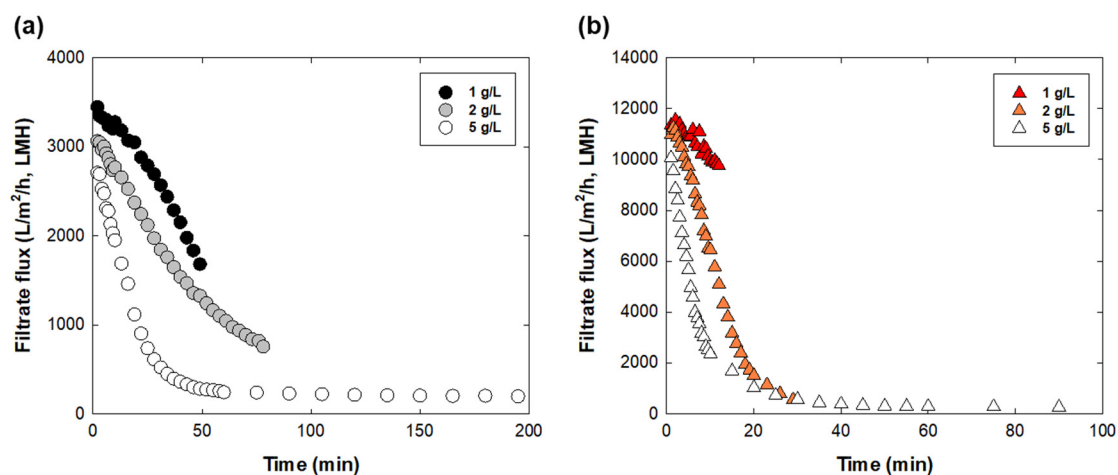

**Figure S5.** Filtrate flux as function of operation time at different BSA concentrations (1, 2, and 5 g/L) using (a) filter A and (b) filter B for final fill.

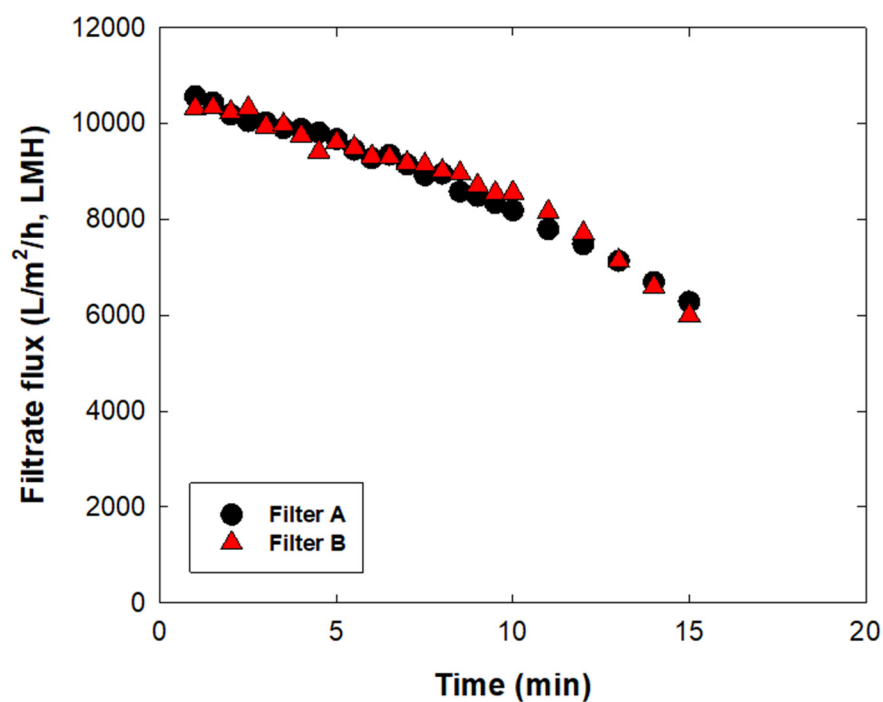

**Figure S6.** Filtrate flux as function of operation time for 2 g/L of BSA solution filtration at same initial flux (approximately 10,500 LMH) with adjusted operating pressure at 1.5 bar for filter A.
